# Supplementary material for: Single-base resolution maps of cultivated and wild rice methylomes and regulatory roles of DNA methylation in plant gene expression
Source: PubMed Central journal article supplement (PMC3447678; doi:10.1186/1471-2164-13-300), 2012-07-02

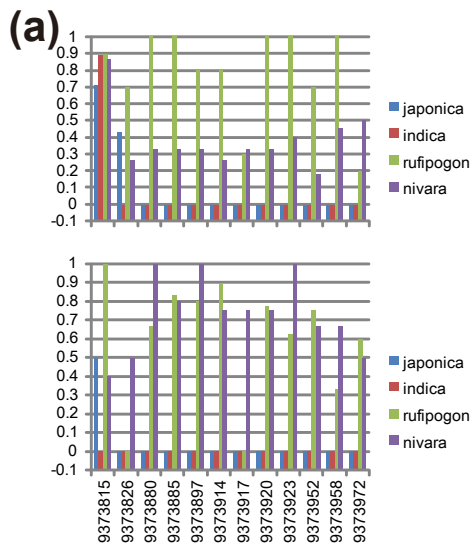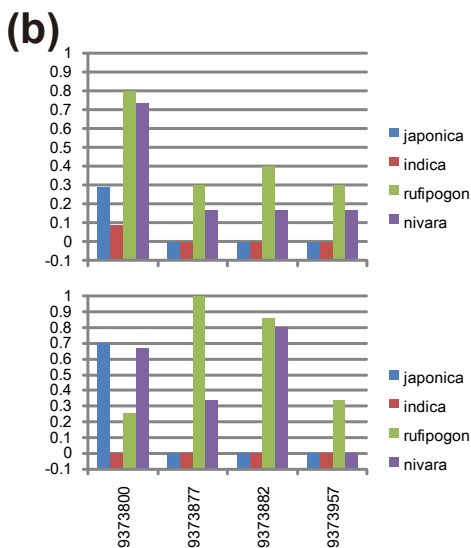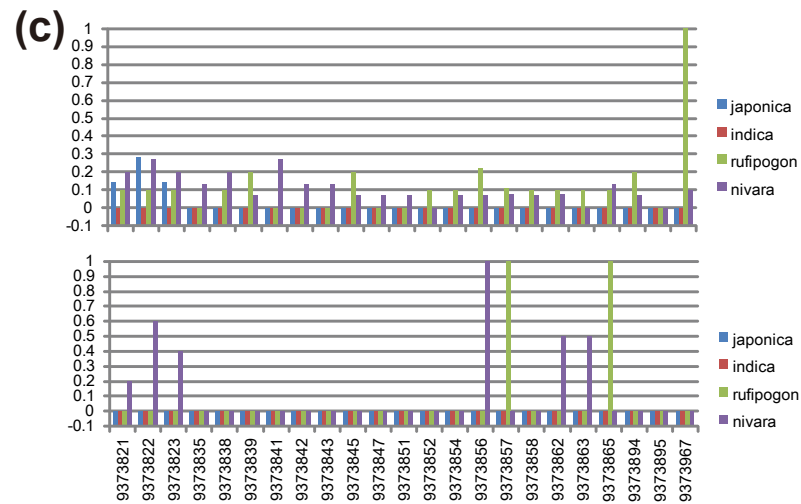

Supplement: 1471-2164-13-300-S9.pdf [file 1471-2164-13-300-S9.pdf]
